# Supplementary material for: Reusable Ag@TiO2-Based Photocatalytic Nanocomposite Membranes for Solar Degradation of Contaminants of Emerging Concern
Source: MDPI journal article supplement (doi:10.3390/polym13213718), 2021-10-28
Supplement: s1 [file s1]

## Reusable Ag@TiO<sub>2</sub> Based Photocatalytic Nanocomposite Membranes for Solar Degradation of Contaminants of Emerging Concern

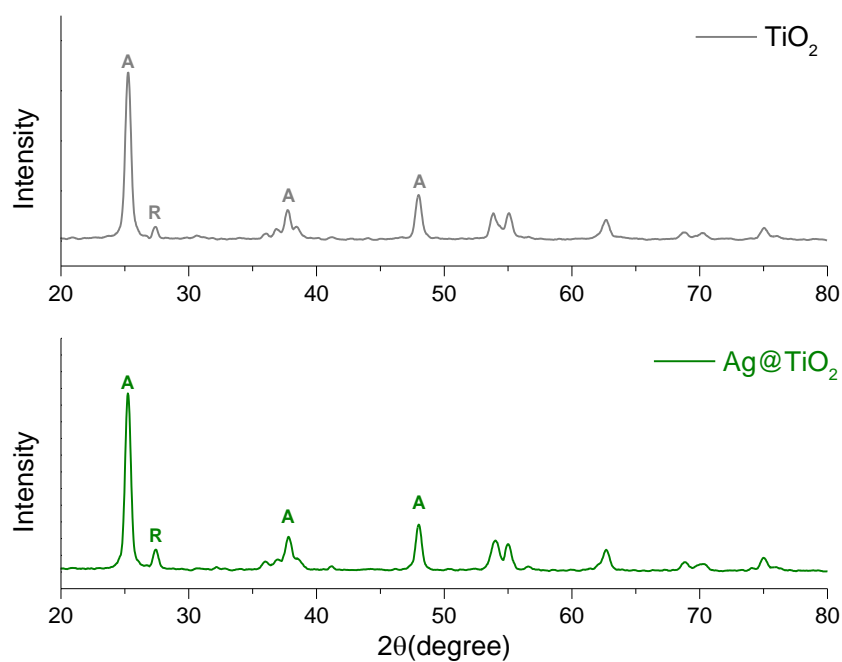

**Figure S1.** X-ray diffraction patterns of pristine TiO<sub>2</sub> and Ag-TiO<sub>2</sub> nanocomposite and identification of the representative peaks for anatase (A) and rutile (R) phases
